# Supplementary material
Source: PubMed Central journal article supplement (PMC1955812)
Supplement: pnas_0701904104_10.pdf [file pnas_0701904104_10.pdf]

Table 3. Libraries and screening conditions

| Library                            | 1 <sup>*</sup>  | 2                   | 3                   | 4               | 5               | 6               | 7               | 8               | 9 <sup>†</sup>  | 10              | 11              |
|------------------------------------|-----------------|---------------------|---------------------|-----------------|-----------------|-----------------|-----------------|-----------------|-----------------|-----------------|-----------------|
| Library size <sup>‡</sup>          | $1 \times 10^7$ | $1 \times 10^7$     | $5 \times 10^6$     | $2 \times 10^7$ | $6 \times 10^7$ | $5 \times 10^7$ | $6 \times 10^7$ | $5 \times 10^7$ | $1 \times 10^8$ | $1 \times 10^8$ | $1 \times 10^8$ |
| Leu ( $\mu\text{M}$ ) <sup>§</sup> | 45              | 30, 15 <sup>¶</sup> | 7.5, 0 <sup>¶</sup> | 0               | 0               | 0               | 0               | 0               | 0               | 0               | 0               |
| No. of sorting                     | 2               | 2                   | 2                   | 2               | 2               | 2               | 2               | 3 <sup>  </sup> | 2               | 2               | 3 <sup>  </sup> |

<sup>\*</sup>Measured mutation rates in libraries 1 and 9 were 2.4 and 1.9 mutations per gene, respectively.

<sup>†</sup>Clone 8.3.3 was used for library generation.

<sup>‡</sup>Library size was determined by counting colonies after spreading on agar plates.

<sup>§</sup>Leu concentration in medium during protein expression.

<sup>¶</sup>Leu concentration for the first and second sortings, respectively.

<sup>||</sup>After sorting twice, the genes for the GFP mutants were transferred into fresh pQE-80L plasmids.
