# Supplementary material
Source: PubMed Central journal article supplement (PMC1955812)

**A**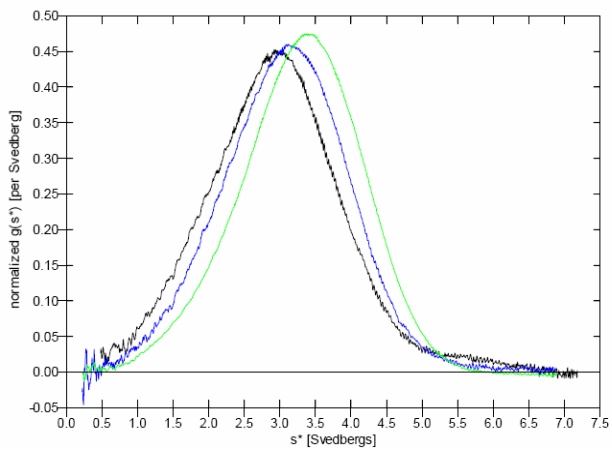**B**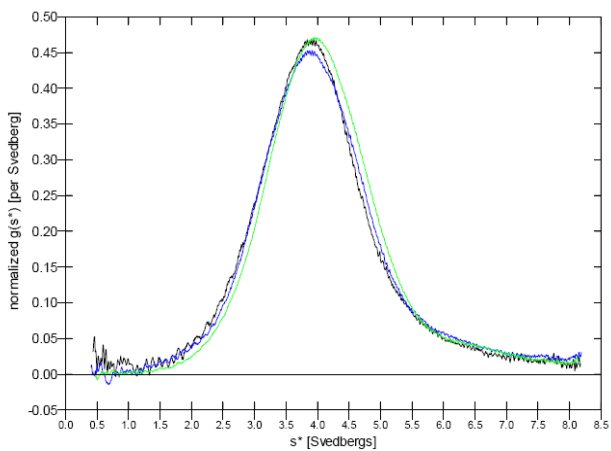**C**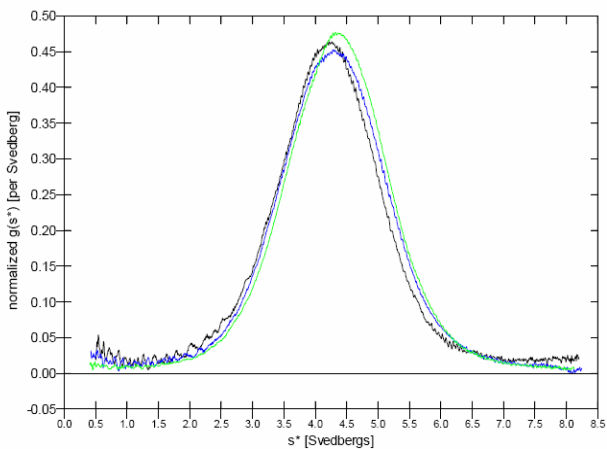

Supplement: pnas_0701904104_8.pdf [file pnas_0701904104_8.pdf]
